# Supplementary material for: AIM² Framework for Smart Marketing Innovation: AI-Driven Consumer Analytics Using SOR, Neural Networks, and XGBoost in Saudi Retail
Source: Research Square preprint supplement (doi:10.21203/rs.3.rs-8295953/v1), 2026-01-09
Supplement: Supplementary file 1 [file 5d459855221c298a64d3dd3e.docx]

| **Question** | **Hypothesis (if applicable)** | **Sampling plan (e.g. power analysis)** | **Analysis Plan** | **Interpretation given to different outcomes** |
| --- | --- | --- | --- | --- |
| Will K-means clustering identify stable and interpretable behavioral consumer segments? | H1: The optimal K-means solution will yield a mean silhouette score ≥ 0.60 (DV = silhouette score; IV = number of clusters k).  H0: The optimal K-means solution will yield a mean silhouette score < 0.60. | All available consumer transactional records in the Saudi retail dataset will be included. No power analysis is applicable because this is an unsupervised clustering analysis using the full population dataset. | Test cluster validity using silhouette score, Davies–Bouldin index, and elbow method.  IF distributions of feature scales vary → THEN data will be standardized using z-scores.  IF silhouette score < 0.60 → THEN equivalence testing or Bayes Factors will determine whether the observed clustering structure is statistically indistinguishable from random partitioning.  Bootstrapping (1,000 resamples) will assess cluster stability. | H1 supported: Silhouette ≥ 0.60 → meaningful segmentation.  H0 supported via BF or equivalence test: Clusters indistinguishable from random structure → segmentation not meaningful.  Intermediate scores (0.40–0.59): Model will report partial structure; no claim of evidential absence unless Bayes Factor favors H0. |
| Will association rule mining reveal strong co-purchase patterns consistent with typical retail behavior? | H1: At least one association rule will exhibit lift ≥ 1.20 and confidence ≥ 0.20 (DV = rule metrics; IV = item combinations).  H0: No association rule will exceed lift 1.20 and confidence 0.20. | All transactions in the dataset will be used. As with RQ1, no subset selection or power analysis is applicable for association rule mining. | Use Apriori or FP-Growth with minimum support threshold (e.g., 0.01).  Extract top rules ranked by lift.  IF rules show extreme sparsity → THEN support threshold will be lowered iteratively (0.01 → 0.005 → 0.001).  Bayesian model evidence will be used to evaluate whether rule metrics differ credibly from what would be expected under random-item permutations. | H1 supported: Lift ≥ 1.20 and confidence ≥ 0.20 → meaningful associations.  Bayesian evidence favors H0: No rule meaningfully exceeds random expectation.  Report metrics without interpreting non-significant differences as evidence of no structural association. |
| Will XGBoost outperform neural networks in forecasting consumer purchase quantities? | H1: XGBoost will produce significantly lower RMSE than the neural network model (DV = RMSE; IV = model type).  H0: RMSE(XGBoost) ≥ RMSE(Neural Network). | Train/test split of the full dataset (e.g., 80/20). Power analysis based on paired RMSE differences:  Expected medium effect size (dz = 0.5).  Required n = 34 paired forecasting periods for 80% power (two-tailed α = 0.05).  Dataset includes far more than 34 forecasting periods → power is sufficient. | Compare RMSE, MAE, and MAPE across identical forecast horizons.  Use paired t-test if error distributions are normal;  IF Shapiro-Wilk p < .05 → THEN use Wilcoxon signed-rank test.  Bayes Factor will quantify evidence for or against superior performance.  Equivalence test (TOST) will evaluate whether models are statistically equivalent when differences are small. | H1 supported: RMSE significantly lower for XGBoost.  H0 supported via BF or equivalence test: Models statistically equivalent or NN performs equal/better.  Non-significant NHST differences alone will NOT be interpreted as evidence of equivalence unless supported by Bayes Factors or TOST. |
| Are AI-derived stimuli (cluster profiles, association metrics, price sensitivity) associated with organism-level constructs (trust, perceived value, satisfaction)? | H1: AI-derived stimuli will show significant positive correlations with organism-level constructs (DV = organism-level variable; IV = stimulus variable).  H0: The correlation between stimuli and organism-level constructs is statistically indistinguishable from zero. | Minimum required sample for correlational analysis:  Expected effect size r = 0.25 (based on prior consumer-psychology studies).  Power analysis: n = 123 required for 80% power.  Dataset provides > 123 customers → adequate power. | Compute Pearson correlations.  IF non-normal distributions → THEN Spearman correlations.  Bayes Factors will quantify evidence for presence or absence of associations.  IF observed r falls within a predefined equivalence region (–0.10 to +0.10) → THEN TOST equivalence test will be applied. | H1 supported: Credible positive association supported by BF > 3.  H0 supported: Correlation in equivalence region and supported by BF > 3 for no association.  Non-significant p-values alone will not be interpreted as evidence for no association. |
