# Supplementary material for: AIM² Framework for Smart Marketing Innovation: AI-Driven Consumer Analytics Using SOR, Neural Networks, and XGBoost in Saudi Retail
Source: Research Square preprint supplement (doi:10.21203/rs.3.rs-8295953/v1), 2026-01-09
Supplement: Supplementary file 2 [file f1761965b69aefa55f2bf69e.docx]

| **Attribute** | **Type** | **Description** | **Example/Range** |
| --- | --- | --- | --- |
| Transaction_ID | Integer | Unique identifier of each transaction | 1 … 1,200,000 |
| Customer_ID | Integer | Pseudonymized customer identifier | 10001 … 480,000 |
| Product_Category | Categorical | Product category (dairy, meat, bakery, etc.) | ~25 categories |
| Product_Price (SAR) | Numeric | Unit price in SAR | 1.0 … 499.0 |
| Quantity | Integer | Units purchased | 1 … 50 |
| Date | Date | Transaction timestamp | 2022–2024 |
